# Supplementary material for: Enhanced dispersion of prussian blue via intercalation into layered double hydroxides for efficient solar seawater evaporation
Source: Royal Society of Chemistry journal article supplement (doi:10.1039/d4dt01300j), 2024-01-01
Supplement: d4dt01300j1.pdf [file d4dt01300j1.pdf]

## Supporting Information

### **Enhanced Dispersion of Prussian Blue via Intercalation into Layered Double Hydroxides for Efficient Solar Seawater Evaporation**

Weixin Mo<sup>a</sup>, Qianqian Hu<sup>a</sup>, Jun Guan<sup>a</sup>, Yu Jiang<sup>b</sup>, Weiliang Tian<sup>c</sup>, Huiyu Li<sup>a,\*</sup>, Fabrice Leroux<sup>d</sup>, Yongjun Feng<sup>a,c,\*</sup>

a. State Key Laboratory of Chemical Resource Engineering, College of Chemistry, Beijing University of Chemical Technology, No. 15 Beisanhuan East Road, Beijing, 100029, China.

b. Beijing Municipal Construction Group Co. Ltd, A40 Xingshikou Road, Haidian District, Beijing, China, 100195.

c. College of Chemistry and Chemical Engineering, Tarim University, Alar, 843300, PR China.

d. Chemical Institute of Clermont-Ferrand (ICCF), University Clermont Auvergne, UMR-CNRS No 6296, F\_63171 Aubière, France

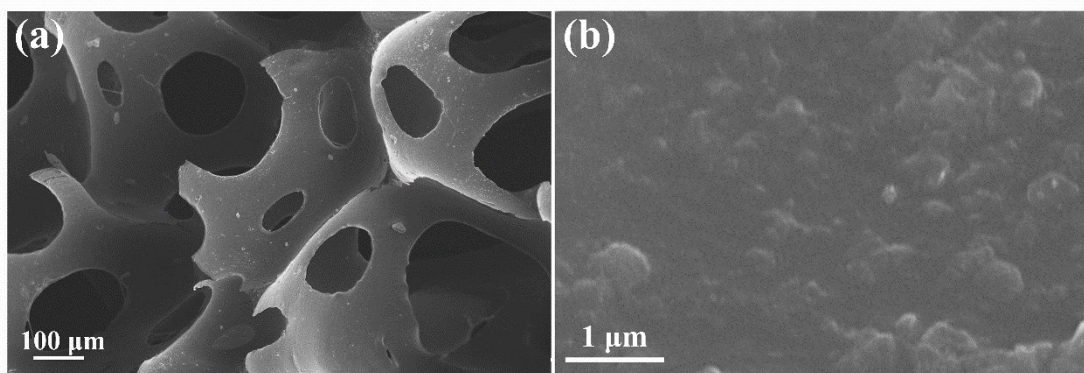

**Fig. S1** Morphologies of SDS-PBA<sub>2</sub>@LDHs/PU at the scale of (a)100 μm and (b) 1 μm.

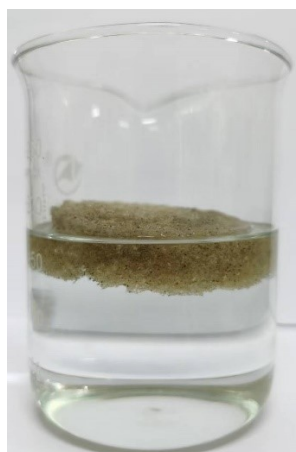

**Fig. S2** Digital photo of SDS-PBA<sub>2</sub>@LDHs/PU floating on water.

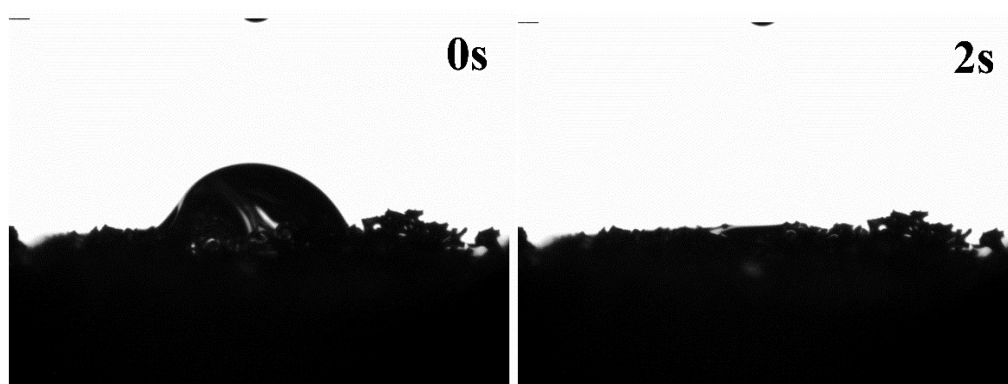

**Fig. S3** The water contact angle of SDS-PBA<sub>2</sub>@LDHs/PU.
